# Supplementary material
Source: Elsevier journal article supplement (https://www.sciencedirect.com/science/article/pii/S0300289621002167)
Supplement: mmc1 [file S0300289621002167:mmc1.pdf]

**Pregunta para responder: ¿Se deben prescribir morfícos para la disnea refractaria en la EPOC?**

Se identificó una revisión sistemática (RS) relevante que incluía 14 ensayos clínicos aleatorizados (ECAs) que evalúa los efectos del tratamiento con opioides en la disnea refractaria en pacientes con EPOC. No se incluyeron 3 ECA en el análisis por no proporcionar datos extrapolables para el metaanálisis (Masood 1995), presentar datos de desenlaces no relevantes (Young 1989) o comparar opioides con otras intervenciones (no placebo) (Rice 1987).

Posteriormente, se identificó 3 ECAs recientes y relevantes (Currow 2020, Abdallah 2017, Janowiak 2017).

Para el análisis se seleccionaron finalmente 14 ECAs con un total de 642 pacientes. Las características de los participantes y de la intervención fueron muy variables. La mayoría incluyó pacientes ambulatorios aunque un estudio incluyó pacientes ingresados en el hospital (Noseda 1997) o mixtos (Currow 2020). Todos los estudios excepto uno (Currow 2020) tuvieron un diseño cruzado. Un total de 4 estudios, los participantes no estaban siendo tratados con morfícos previamente (Abernethy 2003, Jensen 2012, Johnson 1983, Poole 1998). La valoración de los desenlaces fue también variable entre 1 hora y 6 semanas.

El tipo de morfíco y ruta de administración fueron también muy variables:

|                | <b>Tipo de opioide</b> | <b>Ruta de administración</b> |
|----------------|------------------------|-------------------------------|
| Abdallah 2017  | Morfina                | Oral                          |
| Abernethy 2003 | Morfina                | Oral                          |
| Bar-Or 1982    | Dihidrocodeína         | Oral                          |
| Currow 2020    | Morfina                | Oral                          |
| Eiser 1991     | Diamorfina             | Oral                          |
| Jankelson 1997 | Morfina                | Nebulización                  |
| Janowiak 2017  | Morfina                | Nebulización                  |
| Jensen 2012    | Fentanilo              | Nebulización                  |
| Johnson 1983   | Dihidrocodeína         | Oral                          |
| Leung 1996     | Morfina                | Nebulización                  |
| Light 1996     | Morfina                | Oral                          |
| Noseda 1997    | Morfina                | Nebulización                  |
| Poole 1998     | Morfina                | Oral                          |
| Woodcock 1981  | Dihidrocodeína         | Oral                          |

**Revisión sistemática:**

1. Barnes H, McDonald J, Smallwood N, Manser R. Opioids for the palliation of refractory breathlessness in adults with advanced disease and terminal illness. Cochrane Database Syst Rev. 2016 Mar 31;3(3):CD011008.

**Ensayos clínicos aleatorizados:**

1. Abdallah SJ, Wilkinson-Maitland C, Saad N, Li PZ, Smith BM, Bourbeau J, et al. Effect of morphine on breathlessness and exercise endurance in advanced COPD: a randomised crossover trial. The European respiratory journal. 2017;50(4).
2. Abernethy AP, Currow DC, Frith P, Fazekas BS, McHugh A, Bui C. Randomised, double blind, placebo controlled crossover trial of sustained release morphine for the management of refractory dyspnoea. BMJ 2003;327(7414):523-8.
3. Bar-Or D, Marx JA, Good J. Breathlessness, alcohol and opiates. The New England Journal of Medicine 1982;306(22):1363-4.
4. Currow D, Louw S, McCloud P, Fazekas B, Plummer J, McDonald CF, Agar M, Clark K, McCaffrey N, Ekström MP; Australian National Palliative Care Clinical Studies Collaborative (PaCCSC). Regular, sustained-release morphine for chronic breathlessness: a multicentre, double-blind, randomised, placebo-controlled trial. Thorax. 2020 Jan;75(1):50-56.

5. Eiser N, Denman WT, West C, Luce P. Oral diamorphine: lack of effect on dyspnoea and exercise tolerance in the "pink puffer" syndrome. *European Respiratory Journal* 1991;4(8):926-31.
6. Jankelson D, Hosseini K, Mather LE, Seale JP, Young IH. Lack of effect of high doses of inhaled morphine on exercise endurance in chronic obstructive pulmonary disease. *European Respiratory Journal* 1997;10(10):2270-4.
7. Janowiak P, Krajnik M, Podolec Z, Bandurski T, Damps-Konstańska I, Sobański P, et al. Dosimetrically administered nebulized morphine for breathlessness in very severe chronic obstructive pulmonary disease: A randomized, controlled trial. *BMC Pulmonary Medicine*. 2017;17(1).
8. Jensen D, Alsuhaib A, Viola R, Dudgeon DJ, Webb KA, O'Donnell DE. Inhaled fentanyl citrate improves exercise endurance during high-intensity constant work rate cycle exercise in chronic obstructive pulmonary disease. *Journal of Pain and Symptom Management* 2012;43(4):706-19.
9. Johnson MA, Woodcock AA, Geddes DM. Dihydrocodeine for breathlessness in "pink puffers". *British Medical Journal (Clinical Research Edition)* 1983;286(6366):675-7.
10. Leung R, Hill P, Burdon J. Effect of inhaled morphine on the development of breathlessness during exercise in patients with chronic lung disease. *Thorax* 1996;51(6):596-600.
11. Light RW, Stansbury DW, Webster JS. Effect of 30 mg of morphine alone or with promethazine or prochlorperazine on the exercise capacity of patients with COPD. *Chest* 1996;109(4):975-81.
12. Masood AR, Reed JW, Thomas SH. Lack of effect of inhaled morphine on exercise-induced breathlessness in chronic obstructive pulmonary disease. *Thorax* 1995;50(6):629-34.
13. Nosedá A, Carpioux JP, Markstein C, Meyvaert A, de Maertelaer V. Disabling dyspnoea in patients with advanced disease: lack of effect of nebulized morphine. *European Respiratory Journal* 1997;10(5):1079-83.
14. Poole PJ, Veale AG, Black PN. The effect of sustained-release morphine on breathlessness and quality of life in severe chronic obstructive pulmonary disease. *American Journal of Respiratory and Critical Care Medicine* 1998;157(6):1877-80.
15. Rice KL, Kronenberg RS, Hedemark LL, Niewoehner DE. Effects of chronic administration of codeine and promethazine on breathlessness and exercise tolerance in patients with chronic airflow obstruction. *British Journal of Diseases of the Chest* 1987;81(3):287-92.
16. Woodcock AA, Gross ER, Gellert A, Shah S, Johnson M, Geddes DM. Effects of dihydrocodeine, alcohol, and caffeine on breathlessness and exercise tolerance in patients with chronic obstructive lung disease and normal blood gases. *The New England Journal of Medicine* 1981;305(27):1611-6.
17. Young IH, Daviskas E, Keena VA. Effect of low dose nebulised morphine on exercise endurance in patients with chronic lung disease. *Thorax* 1989;44(5):387-90.

## OPIOIDES vs PLACEBO

### Disnea

|                                                                                                                                                                                                                                                                                                                                                                                                                                                                                                                                                                                                                                                                                                                                                                                                                                                                      |                            |
|----------------------------------------------------------------------------------------------------------------------------------------------------------------------------------------------------------------------------------------------------------------------------------------------------------------------------------------------------------------------------------------------------------------------------------------------------------------------------------------------------------------------------------------------------------------------------------------------------------------------------------------------------------------------------------------------------------------------------------------------------------------------------------------------------------------------------------------------------------------------|----------------------------|
| <p>El tratamiento con opioides muestra una reducción significativa en <b>la puntuación de la disnea</b> respecto a placebo: SMD 0.18 menos (0.34 a 0.03 menos) (14 ECAs, 642 participantes). El estimador muestra el tamaño del efecto medido principalmente a través de la escala VAS y Borg.</p> <p>La confianza con los resultados es <b>baja</b> (ver tabla de resumen de resultados).</p> <p>El IC95% incluye un efecto observado moderado o irrelevante. La heterogeneidad es significativa para los estudios que evaluaron el cambio respecto al basal de la puntuación, aunque principalmente debida a un solo estudio.</p> <p>Los 4 ECA que evaluaron el <b>cambio medio respecto a la puntuación inicial de la disnea</b> respecto a placebo mostraron un efecto no significativo: SMD 0.44 menos (1.04 menos a 0.16 más). Los 10 ECA que evaluaron la</p> | <p><b>Calidad baja</b></p> |
|----------------------------------------------------------------------------------------------------------------------------------------------------------------------------------------------------------------------------------------------------------------------------------------------------------------------------------------------------------------------------------------------------------------------------------------------------------------------------------------------------------------------------------------------------------------------------------------------------------------------------------------------------------------------------------------------------------------------------------------------------------------------------------------------------------------------------------------------------------------------|----------------------------|

**puntuación post-tratamiento de la disnea respecto a placebo mostraron un efecto significativo: SMD 0.27 menos (0.5 menos a 0.04 menos).**

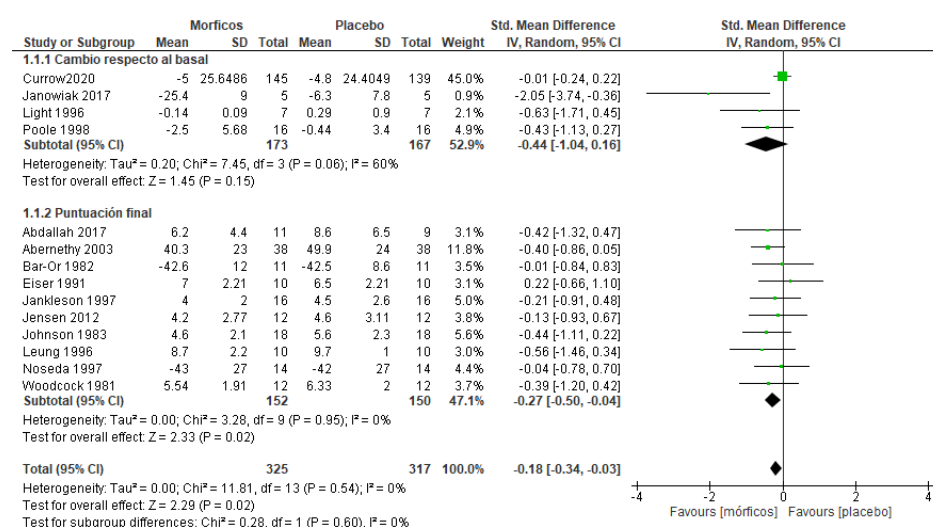

El único estudio paralelo y de mayor tamaño en 284 pacientes mayoritariamente EPOC (58%) ingresados o ambulatorios que recibieron morfina oral (20 mg) o placebo durante 7 días no mostró diferencias significativas en la escala VAS de disnea: DM= 0.15 menos (4.59 menos a 4.29 más) (Currow 2020)

## Disnea: análisis por tipo de mórficos

El análisis por tipo de mórfico muestra un efecto más marcado para la dihidrocodeína y la morfina que para la diamorfina oral o el fentanilo nebulizado. La duración de la intervención en estos últimos fue de dos semanas y dos días respectivamente.

**Dihidrocodeína:** SMD 0.31 menos (0.74 menos a 0.13 más) (3 ECA, 83 pacientes)

**Morfina:** SMD 0.16 menos (0.34 menos a 0.01 más) (9 ECAs, 516 pacientes)

**Diamorfina:** SMD 0.22 más (0.66 menos a 1.10 más) (1 ECA, 20 pacientes)

**Fentanilo:** SMD 0.13 menos (0.93 menos a 0.67 más) (1 ECA, 24 pacientes)

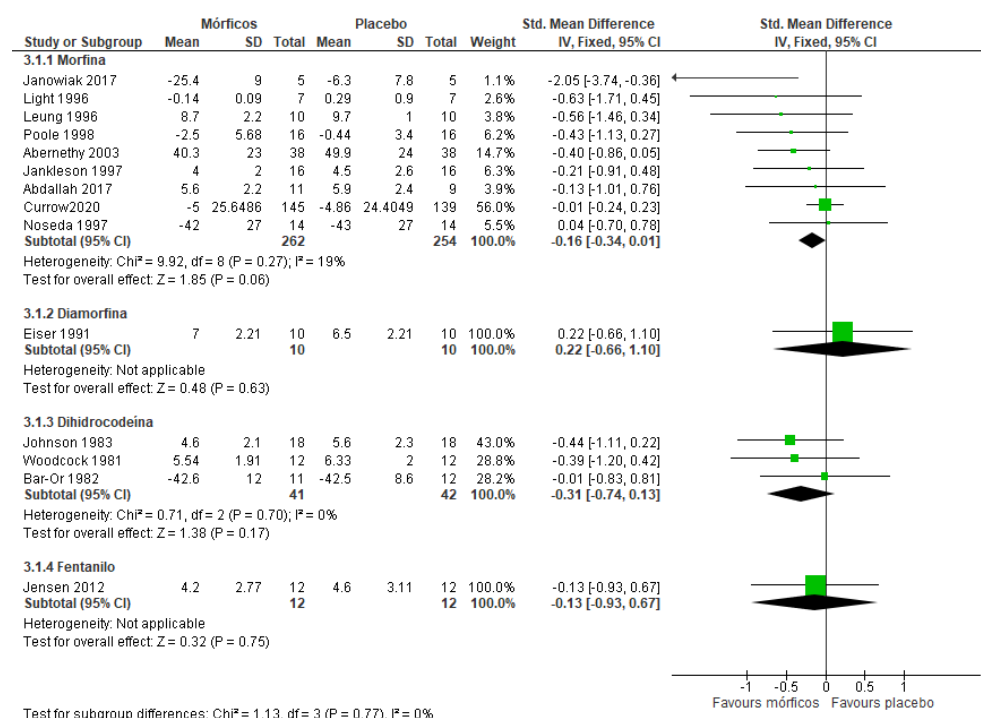

Test for subgroup differences:  $\chi^2 = 1.13$ ,  $df = 3$  ( $P = 0.77$ );  $I^2 = 0\%$

**Disnea: análisis por vías de administración de mórficos**

Ambas rutas de administración (oral o nebulizada) no muestran una reducción significativa de la puntuación de la disnea. Aunque el estimador central muestra un tamaño del efecto pequeño a moderado, en ambos casos existe imprecisión en los resultados dado que el IC95% no excluye un tamaño de efecto relevante.

**Oral:** SMD 0.11 menos (0.29 menos a 0.06 más) (9 ECAs, 516 pacientes)

**Nebulizada:** SMD 0.30 menos (0.68 menos a 0.08 más) (5 ECA, 114 pacientes)

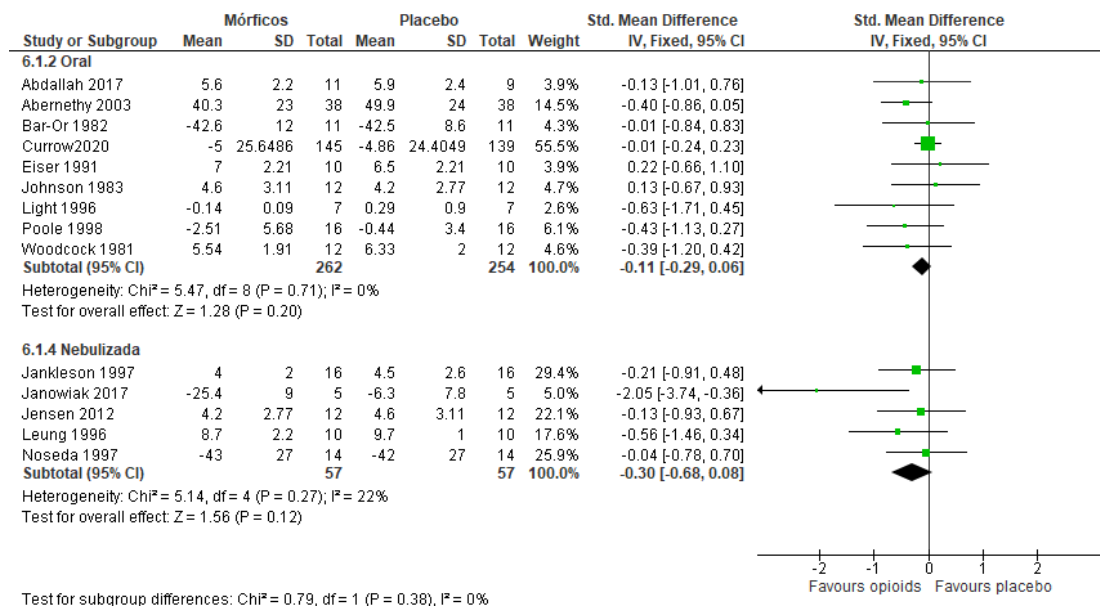**Disnea: análisis por escalas de medición (o instrumentos de medición) de la disnea**

El tratamiento con opioides no muestra una reducción significativa en la puntuación de la disnea medida con la escala de VAS [MD 1.4 puntos menos (3.46 menos a 0.66 más) (7 ECAs, 478 participantes)]. La evaluación con la escala Borg [MD 0.54 puntos menos (1.09 a 0.01 menos) (4 ECAs, 110 participantes)], muestra una reducción que es significativa.

La variabilidad en los resultados de los estudios que usaron la escala VAS es muy importante, probablemente debido a la combinación de resultados finales y de cambios respecto al basal. Los resultados finales pueden estar influenciados por grupos no balanceados al inicio del tratamiento. Al eliminar los estudios que evaluaron cambios al final del tratamiento desaparece la heterogeneidad.

Los resultados para la escala de Borg no excluyen un efecto clínicamente relevante con una reducción superior a 1 punto.

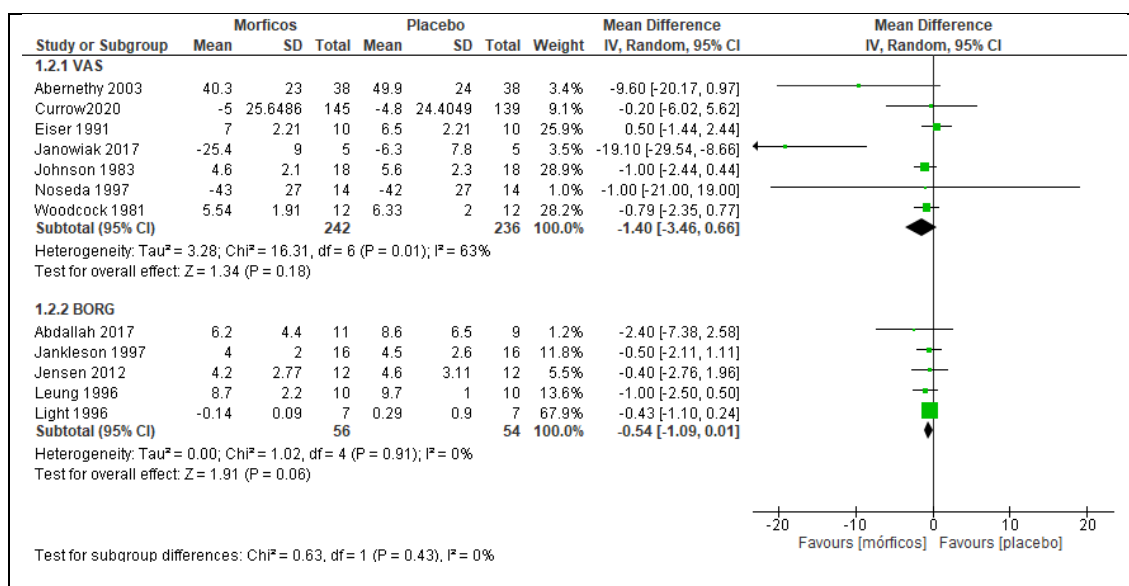

### Tolerancia al ejercicio

Aunque la tolerancia al ejercicio se midió con instrumentos diferentes, en general no se muestran diferencias significativas entre los dos grupos de tratamiento, excepto para el estudio de Poole 1998 que evaluó el cambio respecto al basal en el test de los 6 minutos.

El estudio de Poole 1998 mostró una diferencia de 56.7 metros (IC95% de 44.37 a 69.03 metros) en el test de los 6 minutos favorable al grupo placebo, que no excluye un efecto clínicamente relevante. Este estudio es el único en este sentido del efecto y no mostró diferencias en la puntuación de disnea ni en calidad de vida.

El efecto global no muestra un efecto significativo 9 ECA, 212 pacientes, SMD -0.08 (IC95% -0.81 a 0.65).

La confianza con los resultados es **muy baja** (ver tabla de resumen de resultados).

### Análisis de diferencia de medias por test de tolerancia al ejercicio

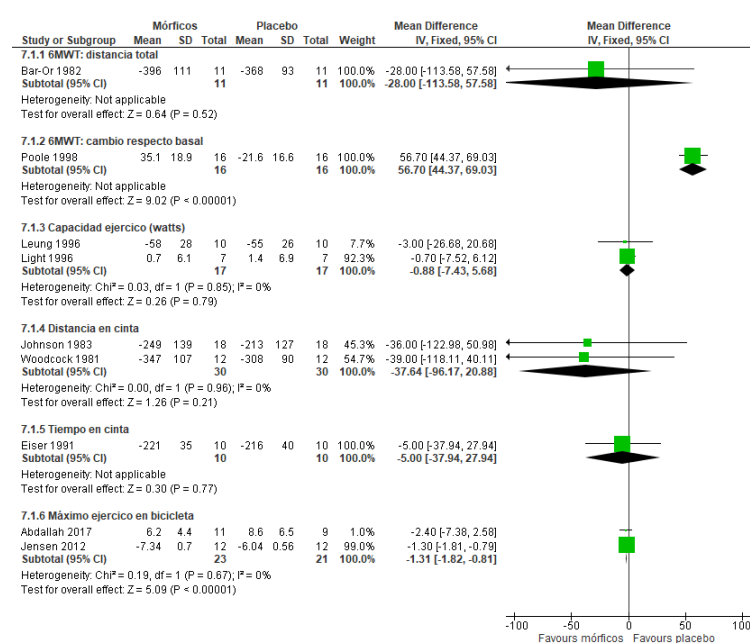

### Análisis de diferencias estandarizada de medias, efecto global

**Calidad muy baja**

## Eventos adversos

En el análisis conjunto de los datos, los participantes del grupo tratamiento con opioides experimentaron más eventos adversos relacionados con estreñimiento [7 ECAs, 495 pacientes, RR 1.97 (1.13 a 3.44) o 270 más por 1000 (de 36 más a 680 más)], náuseas y vómitos [5 ECAs, 379 pacientes, RR 1.74 (1.28 a 2.37) o 163 más por 1000 (de 62 más a 302 más)], y somnolencia [7 ECAs, 483 pacientes, RR 1.22 (1.00 a 1.50) o 69 más por 1000 (de 0 a 158 más)], en comparación con los participantes del grupo placebo.

La confianza con los resultados es **moderada- baja** (ver tabla de resumen de resultados).

**Calidad moderada-baja**

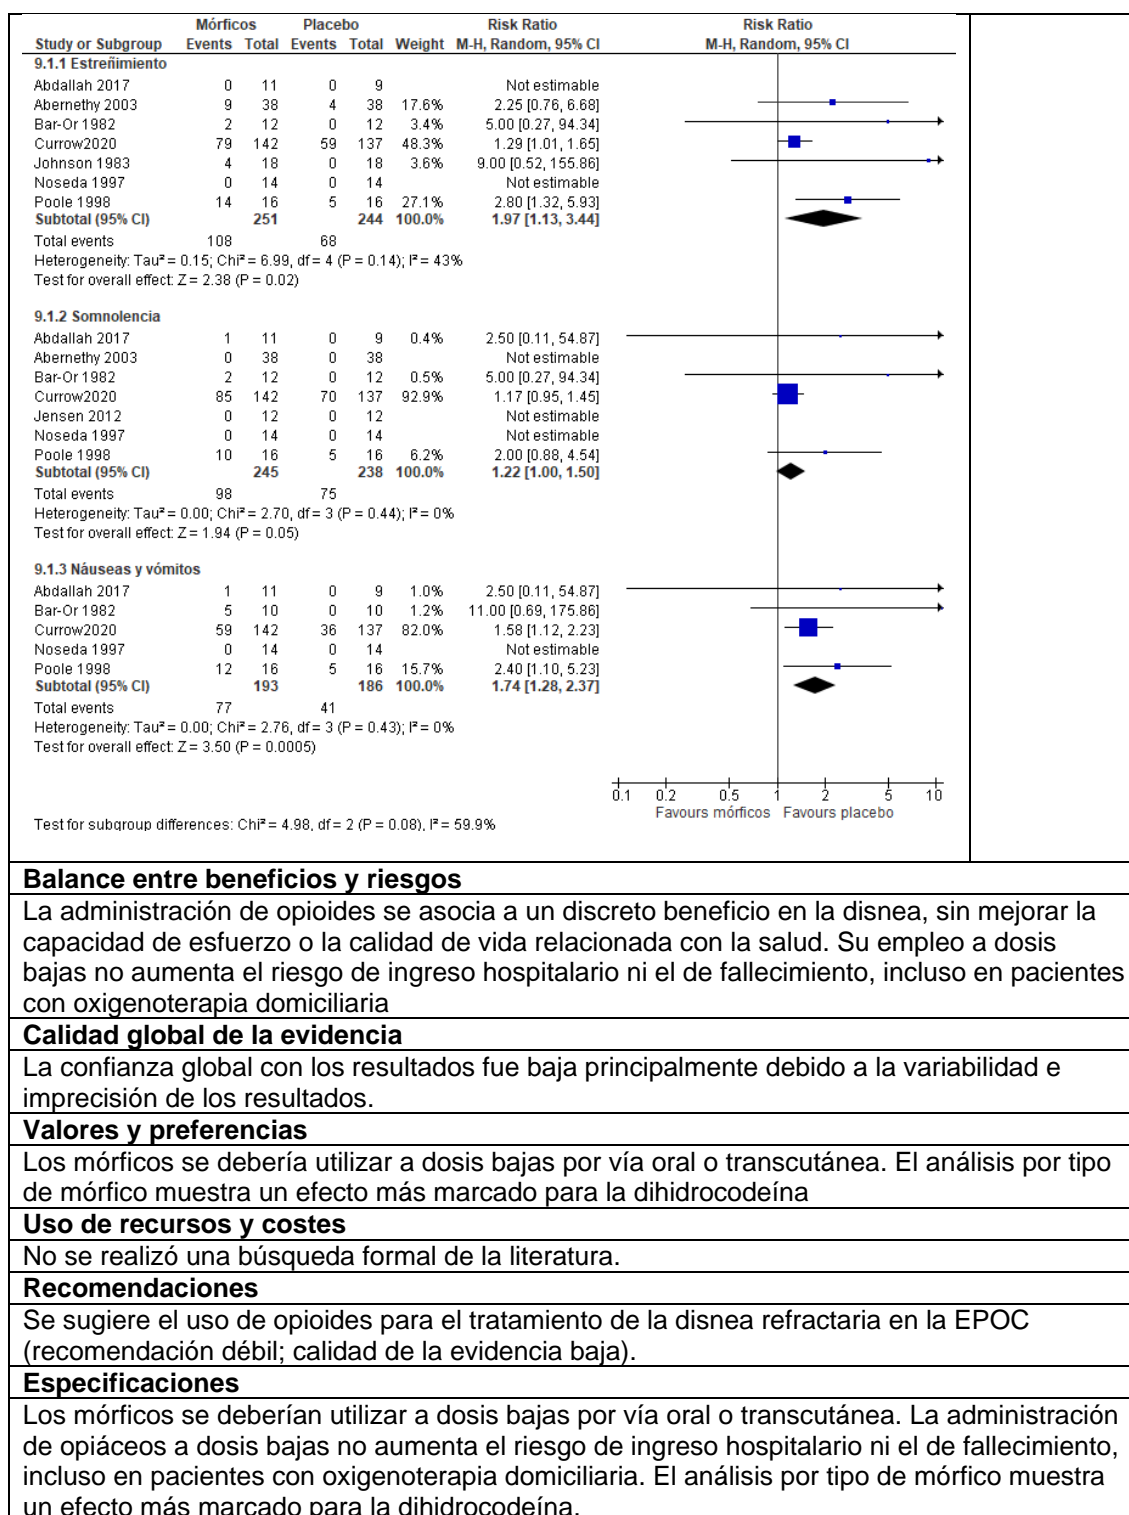

### Balance entre beneficios y riesgos

La administración de opioides se asocia a un discreto beneficio en la disnea, sin mejorar la capacidad de esfuerzo o la calidad de vida relacionada con la salud. Su empleo a dosis bajas no aumenta el riesgo de ingreso hospitalario ni el de fallecimiento, incluso en pacientes con oxigenoterapia domiciliaria

### Calidad global de la evidencia

La confianza global con los resultados fue baja principalmente debido a la variabilidad e imprecisión de los resultados.

### Valores y preferencias

Los mórficos se debería utilizar a dosis bajas por vía oral o transcutánea. El análisis por tipo de mórfico muestra un efecto más marcado para la dihidrocodeína

### Uso de recursos y costes

No se realizó una búsqueda formal de la literatura.

### Recomendaciones

Se sugiere el uso de opioides para el tratamiento de la disnea refractaria en la EPOC (recomendación débil; calidad de la evidencia baja).

### Especificaciones

Los mórficos se deberían utilizar a dosis bajas por vía oral o transcutánea. La administración de opiáceos a dosis bajas no aumenta el riesgo de ingreso hospitalario ni el de fallecimiento, incluso en pacientes con oxigenoterapia domiciliaria. El análisis por tipo de mórfico muestra un efecto más marcado para la dihidrocodeína.

# Pregunta: Mórficos comparado con placebo para disnea refractaria en pacientes con EPOC

| Evaluación de certeza                                                |                    |                    |                          |                          |                    |                       | Nº de pacientes |         | Efecto            |                                                    | Certeza      | Importancia |
|----------------------------------------------------------------------|--------------------|--------------------|--------------------------|--------------------------|--------------------|-----------------------|-----------------|---------|-------------------|----------------------------------------------------|--------------|-------------|
| Nº de estudios                                                       | Diseño de estudio  | Riesgo de sesgo    | Inconsistencia           | Evidencia indirecta      | Imprecisión        | Otras consideraciones | Mórficos        | placebo | Relativo (95% CI) | Absoluto (95% CI)                                  |              |             |
| Disnea (evaluado con : varias escalas)                               |                    |                    |                          |                          |                    |                       |                 |         |                   |                                                    |              |             |
| 14                                                                   | ensayos aleatorios | serio <sup>a</sup> | no es serio              | no es serio <sup>b</sup> | serio <sup>c</sup> | ninguno               | 325             | 317     | -                 | SMD 0.18 menor<br>(0.34 menor a 0.03 menor )       | ⊕⊕○○<br>BAJA |             |
| Disnea - cambio respecto valor basal (evaluado con : varias escalas) |                    |                    |                          |                          |                    |                       |                 |         |                   |                                                    |              |             |
| 4                                                                    | ensayos aleatorios | serio <sup>a</sup> | no es serio              | no es serio <sup>b</sup> | serio <sup>c</sup> | ninguno               | 173             | 167     | -                 | SMD 0.44 SD menor<br>(1.04 menor a 0.16 más alto.) | ⊕⊕○○<br>BAJA |             |
| Disnea - puntuación final (evaluado con : varias escalas)            |                    |                    |                          |                          |                    |                       |                 |         |                   |                                                    |              |             |
| 10                                                                   | ensayos aleatorios | serio <sup>a</sup> | no es serio              | no es serio <sup>b</sup> | serio <sup>c</sup> | ninguno               | 152             | 150     | -                 | SMD 0.27 SD menor<br>(0.5 menor a 0.04 más alto.)  | ⊕⊕○○<br>BAJA |             |
| Disnea por tipo de mórfico - Morfina                                 |                    |                    |                          |                          |                    |                       |                 |         |                   |                                                    |              |             |
| 9                                                                    | ensayos aleatorios | serio <sup>a</sup> | no es serio              | no es serio <sup>b</sup> | serio <sup>c</sup> | ninguno               | 262             | 254     | -                 | SMD 0.16 menor<br>(0.34 menor a 0.01 más alto.)    | ⊕⊕○○<br>BAJA |             |
| Disnea por tipo de mórfico - Diamorfina                              |                    |                    |                          |                          |                    |                       |                 |         |                   |                                                    |              |             |
| 1                                                                    | ensayos aleatorios | serio <sup>a</sup> | no es serio <sup>d</sup> | no es serio <sup>b</sup> | serio <sup>e</sup> | ninguno               | 10              | 10      | -                 | SMD 0.22 más alto.<br>(0.66 menor a 1.1 más alto.) | ⊕⊕○○<br>BAJA |             |
| Disnea por tipo de mórfico - Dihidrocodeína                          |                    |                    |                          |                          |                    |                       |                 |         |                   |                                                    |              |             |
| 3                                                                    | ensayos aleatorios | serio <sup>a</sup> | no es serio              | no es serio <sup>b</sup> | serio <sup>e</sup> | ninguno               | 41              | 42      | -                 | SMD 0.31 menor<br>(0.74 menor a 0.13 más alto.)    | ⊕⊕○○<br>BAJA |             |
| Disnea por tipo de mórfico - Fentanilo                               |                    |                    |                          |                          |                    |                       |                 |         |                   |                                                    |              |             |
| 1                                                                    | ensayos aleatorios | serio <sup>a</sup> | no es serio <sup>d</sup> | no es serio <sup>b</sup> | serio <sup>e</sup> | ninguno               | 12              | 12      | -                 | SMD 0.13 menor<br>(0.93 menor a 0.67 más alto.)    | ⊕⊕○○<br>BAJA |             |
| Disnea por ruta de administración - Oral                             |                    |                    |                          |                          |                    |                       |                 |         |                   |                                                    |              |             |
| 9                                                                    | ensayos aleatorios | serio <sup>a</sup> | no es serio              | no es serio <sup>b</sup> | serio <sup>c</sup> | ninguno               | 262             | 254     | -                 | SMD 0.11 menor<br>(0.29 menor a 0.06 más alto.)    | ⊕⊕○○<br>BAJA |             |
| Disnea por ruta de administración - Nebulizada                       |                    |                    |                          |                          |                    |                       |                 |         |                   |                                                    |              |             |
| 5                                                                    | ensayos aleatorios | serio <sup>a</sup> | no es serio              | no es serio <sup>b</sup> | serio <sup>e</sup> | ninguno               | 57              | 57      | -                 | SMD 0.3 menor<br>(0.68 menor a 0.08 más alto.)     | ⊕⊕○○<br>BAJA |             |

| Evaluación de certeza                                     |                    |                          |                          |                          |                    |                       | Nº de pacientes    |                   | Efecto                   |                                               | Certeza          | Importancia |
|-----------------------------------------------------------|--------------------|--------------------------|--------------------------|--------------------------|--------------------|-----------------------|--------------------|-------------------|--------------------------|-----------------------------------------------|------------------|-------------|
| Nº de estudios                                            | Diseño de estudio  | Riesgo de sesgo          | Inconsistencia           | Evidencia indirecta      | Imprecisión        | Otras consideraciones | Mórficos           | placebo           | Relativo (95% CI)        | Absoluto (95% CI)                             |                  |             |
| Tolerancia al ejercicio (evaluado con : diferentes tests) |                    |                          |                          |                          |                    |                       |                    |                   |                          |                                               |                  |             |
| 9                                                         | ensayos aleatorios | serio <sup>a</sup>       | serio <sup>f</sup>       | serio <sup>b,g</sup>     | serio <sup>e</sup> | ninguno               | 11                 | 11                | -                        | SMD 0.08 SD menos<br>(0.81 menos a 0.65 más ) | ⊕○○○<br>MUY BAJA |             |
| Calidad de vida                                           |                    |                          |                          |                          |                    |                       |                    |                   |                          |                                               |                  |             |
| 2                                                         | ensayos aleatorios | no es serio <sup>h</sup> | no es serio <sup>h</sup> | muy serio <sup>b,g</sup> | no es serio        | ninguno               | 161                | 155               | -                        | SMD 0<br>(0.22 menor a 0.22 más alto.)        | ⊕⊕○○<br>BAJA     |             |
| Efectos indeseados - Estreñimiento                        |                    |                          |                          |                          |                    |                       |                    |                   |                          |                                               |                  |             |
| 7                                                         | ensayos aleatorios | serio <sup>a</sup>       | no es serio              | no es serio              | no es serio        | ninguno               | 108/251<br>(43.0%) | 68/244<br>(27.9%) | RR 1.97<br>(1.13 a 3.44) | 270 más por 1000<br>(de 36 más a 680 más )    | ⊕⊕⊕○<br>MODERADO |             |
| Efectos indeseados - Somnolencia                          |                    |                          |                          |                          |                    |                       |                    |                   |                          |                                               |                  |             |
| 7                                                         | ensayos aleatorios | serio <sup>a</sup>       | no es serio              | no es serio              | serio <sup>c</sup> | ninguno               | 98/245<br>(40.0%)  | 75/238<br>(31.5%) | RR 1.22<br>(1.00 a 1.50) | 69 más por 1000<br>(de 0 menos a 158 más )    | ⊕⊕○○<br>BAJA     |             |
| Efectos indeseados - Náuseas y vómitos                    |                    |                          |                          |                          |                    |                       |                    |                   |                          |                                               |                  |             |
| 5                                                         | ensayos aleatorios | serio <sup>a</sup>       | no es serio              | no es serio              | no es serio        | ninguno               | 77/193<br>(39.9%)  | 41/186<br>(22.0%) | RR 1.74<br>(1.28 a 2.37) | 163 más por 1000<br>(de 62 más a 302 más )    | ⊕⊕⊕○<br>MODERADO |             |

CI: Intervalo de confianza ; SMD: Diferencia media estandarizada; RR: Razón de riesgo

## Explicaciones

- Estudios cruzados de duración muy escasa, no se puede descartar el efecto de arrastre. El análisis contempla los estudios como si fueran de grupos paralelos.
- Efecto evaluado con diferencia estandarizada de medias (SMD) por incluir diferentes escalas de medida
- IC95% que no excluye la posibilidad de un efecto irrelevante.
- Estudio único
- Número de pacientes muy escaso, IC95% muy amplio.
- Variabilidad significativa entre los resultados de los distintos estudios.
- Seguimiento muy escaso para evaluar este tipo de desenlaces
- Aunque el análisis incluye un estudio cruzado, el mayor peso (90%) proviene de un estudio paralelo sin limitaciones mayores en el diseño.
